# Supplementary material for: In-silico and structure-based assessment to evaluate pathogenicity of missense mutations associated with non-small cell lung cancer identified in the Eph-ephrin class of proteins
Source: PubMed Central journal article supplement (PMC10584653; doi:10.5808/gi.22069), 2023-09-27
Supplement: gi-22069-Supplementary-Fig-2.pdf [file gi-22069-Supplementary-Fig-2.pdf]

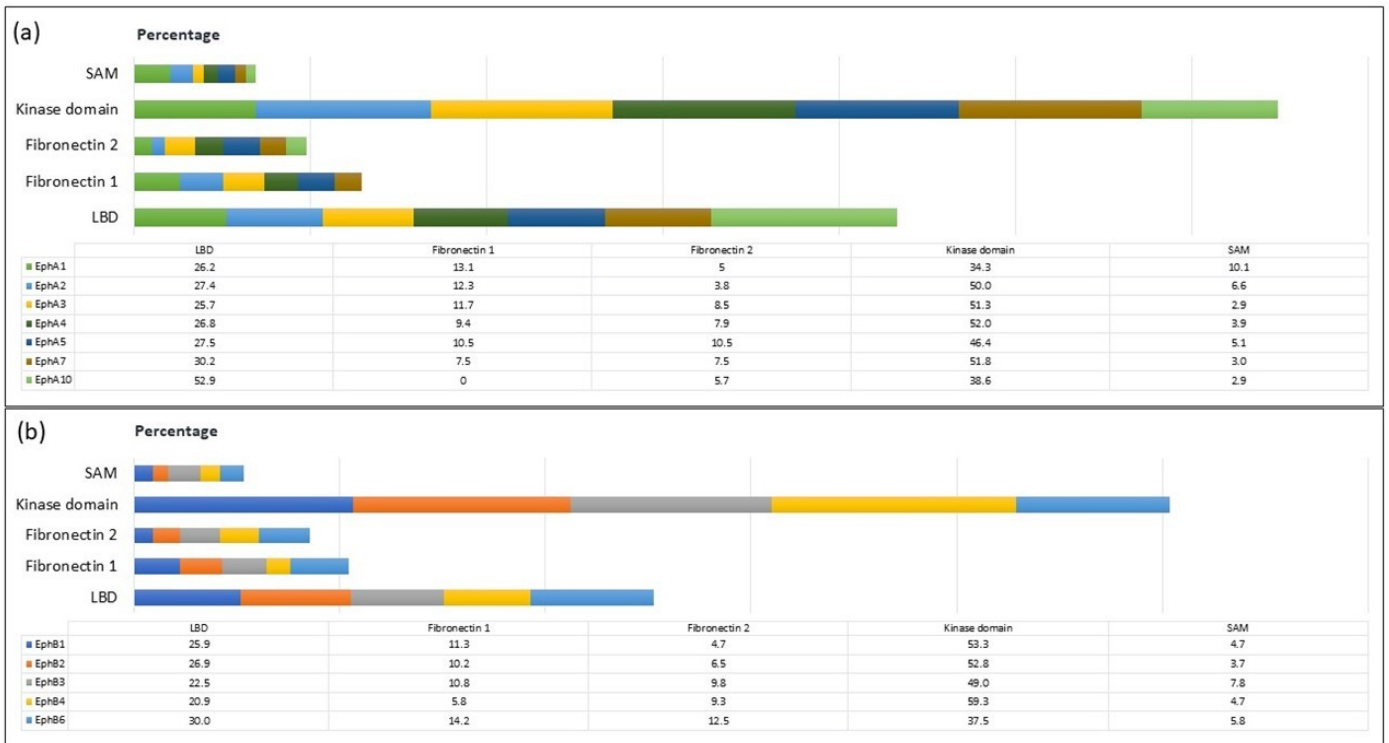

Supplementary figure 2 - Percentage of pathogenic mutations in functional domains of (a) EphA and (b) EphB
