# Supplementary material for: In-silico and structure-based assessment to evaluate pathogenicity of missense mutations associated with non-small cell lung cancer identified in the Eph-ephrin class of proteins
Source: PubMed Central journal article supplement (PMC10584653; doi:10.5808/gi.22069), 2023-09-27
Supplement: gi-22069-Supplementary-Table-1.pdf [file gi-22069-Supplementary-Table-1.pdf]

**Supplementary Table 1 – List of 80 mutations predicted to be pathogenic and altering protein stability**

| <b>Protein</b> | <b>Residue</b> | <b>Position</b> | <b>Mutation</b> | <b>Domain</b> | <b>Subdomain</b>   |
|----------------|----------------|-----------------|-----------------|---------------|--------------------|
| EphA1          | Val            | 918             | Ala             | SAM           | Helix 1            |
| EphA1          | Tyr            | 930             | Cys             | SAM           | Loop               |
| EphA1          | Phe            | 939             | Tyr             | SAM           | Helix 3            |
| EphA2          | Trp            | 52              | Gly             | LBD           | Loop               |
| EphA2          | Phe            | 410             | Iso             | Fibronectin 1 | Beta 7 Fibronectin |
| EphA2          | Leu            | 510             | Pro             | Fibronectin 2 | Beta 6 fibronectin |
| EphA2          | Iso            | 619             | Ser             | Kinase        | beta 1             |
| EphA2          | Phe            | 758             | Cys             | Kinase        | Loop               |
| EphA2          | Leu            | 836             | Phe             | Kinase        | Loop               |
| EphA2          | Arg            | 861             | Pro             | Kinase        | C-terminal Helix   |
| EphA2          | Phe            | 864             | Leu             | Kinase        | C-terminal Helix   |
| EphA3          | Leu            | 33              | Arg             | LBD           | Beta 1             |
| EphA3          | Val            | 73              | Asp             | LBD           | Loop               |
| EphA3          | Iso            | 109             | Asn             | LBD           | Helix 1            |
| EphA3          | Iso            | 146             | Thr             | LBD           | Beta 9             |
| EphA3          | Phe            | 152             | Ser             | LBD           | Helix3             |
| EphA3          | Iso            | 682             | Asn             | Kinase        | Loop               |
| EphA3          | Val            | 688             | Asp             | Kinase        | N-terminal Beta 4  |
| EphA3          | Leu            | 711             | Arg             | Kinase        | C-terminal Helix   |
| EphA3          | Ala            | 748             | Thr             | Kinase        | C-terminal Helix   |
| EphA3          | Ala            | 749             | Asp             | Kinase        | C-terminal Helix   |
| EphA3          | Val            | 762             | Gly             | Kinase        | C-terminal beta    |
| EphA3          | Trp            | 790             | Cys             | Kinase        | Beta Hairpin       |
| EphA3          | Tyr            | 825             | His             | Kinase        | Beta Hairpin       |
| EphA3          | Leu            | 843             | Arg             | Kinase        | Loop               |
| EphA3          | Leu            | 856             | Pro             | Kinase        | C-terminal Beta    |
| EphA3          | Trp            | 861             | Ser             | Kinase        | C-terminal Helix   |
| EphA4          | Leuu           | 33              | Ser             | LBD           | Beta 1             |
| EphA4          | Leu            | 43              | His             | LBD           | Loop               |
| EphA4          | Cys            | 204             | Ser             | LBD           | Beta 13            |
| EphA4          | Gly            | 251             | Asp             | Ectodomain    | Beta Hairpin       |
| EphA4          | Cys            | 366             | Gly             | Fibronectin 1 | Beta 3 fibronectin |
| EphA5          | Tyr            | 99              | His             | LBD           | Beta 3             |
| EphA5          | Phe            | 132             | Val             | LBD           | Beta 7             |
| EphA5          | Leu            | 113             | His             | LBD           | Beta 5             |
| EphA5          | Phe            | 132             | Leu             | LBD           | Beta 7             |
| EphA5          | Phe            | 132             | Cys             | LBD           | Beta 7             |
| EphA5          | Iso            | 736             | Asn             | Kinase        | loop               |
| EphA5          | Iso            | 737             | Asn             | Kinase        | Loop               |
| EphA5          | Leu            | 777             | His             | Kinase        | C-terminal helix   |
| EphA5          | Leu            | 791             | Pro             | Kinase        | C-terminal helix   |
| EphA5          | His            | 798             | Asn             | Kinase        | Loop               |
| EphA5          | Ala            | 802             | Thr             | Kinase        | C-terminal helix   |
| EphA5          | Pro            | 878             | His             | Kinase        | Beta turn          |

|          |     |     |     |        |                      |
|----------|-----|-----|-----|--------|----------------------|
| EphA5    | Pro | 878 | Arg | Kinase | Beta turn            |
| EphA5    | Iso | 888 | Asn | Kinase | C-terminal helix     |
| EphA7    | Iso | 68  | Lys | LBD    | Beta 4               |
| EphA7    | Iso | 149 | Thr | LBD    | Beta 9               |
| EphA7    | Leu | 195 | Ser | LBD    | Beta 12              |
| EphA7    | Leu | 628 | Pro | Kinase | Loop                 |
| EphA7    | Are | 676 | Ser | Kinase | N-terminal helix     |
| EphA7    | Val | 707 | Gly | Kinase | Beta 5               |
| EphA7    | Leu | 749 | Phe | Kinase | C-terminal helix     |
| EphA7    | Trp | 931 | Arg | SAM    | Helix 1              |
| EphA7    | Trp | 873 | Cys | Kinase | C-terminal helix     |
| EphA7    | Iso | 886 | Arg | Kinase | C-terminal helix     |
| EphB1    | Gly | 685 | Cys | Kinase | Beta4                |
| EphB1    | Leu | 721 | His | Kinase | Alpha helix          |
| EphB1    | Val | 741 | Gly | Kinase | Beta C terminal      |
| EphB1    | His | 742 | Asn | Kinase | Beta turn            |
| EphB1    | Val | 760 | Ala | Kinase | Beta C terminal      |
| EphB1    | Gly | 811 | Ala | Kinase | Alpha helix          |
| EphB2    | Trp | 72  | Cys | LBD    | Beta turn            |
| EphB2    | Trp | 135 | Cys | LBD    | Beta turn            |
| EphB2    | Gly | 638 | Asp | Kinase | Beta 1               |
| EphB2    | Leu | 711 | His | Kinase | Helix                |
| EphB2    | Pro | 795 | Gln | Kinase | Helix                |
| EphB2    | Leu | 860 | Arg | Kinase | Helix                |
| EphB3    | Leu | 710 | Pro | Kinase | Beta5                |
| EphB3    | Leu | 749 | Gln | Kinase | C-terminal helix     |
| EphB4    | Trp | 32  | Cys | LBD    | loop                 |
| EphB4    | Phe | 92  | Cys | LBD    | Beta 7               |
| EphB4    | Leu | 166 | Gln | LBD    | Beta 10              |
| EphB4    | Phe | 174 | Cys | LBD    | Beta 11              |
| EphB4    | Leu | 731 | Arg | Kinase | C-terminal Helix     |
| EphB4    | Val | 748 | Ala | Kinase | Beta turn C terminal |
| EphB4    | Pro | 820 | Gln | Kinase | Beta turn C terminal |
| EphrinA2 | Trp | 112 | Cys | RBD    | Beta 6               |
| EphrinB2 | Iso | 160 | Asn | RBD    | Loop                 |
