# Supplementary material for: In-silico and structure-based assessment to evaluate pathogenicity of missense mutations associated with non-small cell lung cancer identified in the Eph-ephrin class of proteins
Source: PubMed Central journal article supplement (PMC10584653; doi:10.5808/gi.22069), 2023-09-27
Supplement: gi-22069-Supplementary-Table-2.pdf [file gi-22069-Supplementary-Table-2.pdf]

| <b>Supplementary Table 2 – List of 32 mutations for different cancer types</b> |                |                 |               |                      |                                                              |
|--------------------------------------------------------------------------------|----------------|-----------------|---------------|----------------------|--------------------------------------------------------------|
| <b>S.No.</b>                                                                   | <b>Protein</b> | <b>Mutation</b> | <b>Domain</b> | <b>Wild type PDB</b> | <b>Cancer type</b>                                           |
| 1.                                                                             | EphA2          | I619S           | Kinase        | 4P2K                 | Ampullary carcinoma                                          |
| 2.                                                                             | EphA2          | F758C           | Kinase        | 4P2K                 | Esophagogastric Adenocarcinoma                               |
| 3.                                                                             | EphA3          | I109N           | LBD           | 4L0P                 | Breast cancer                                                |
| 4.                                                                             | EphA3          | F152S           | LBD           | 4L0P                 | Non-small cell lung cancer                                   |
| 5.                                                                             | EphA3          | I682N           | Kinase        | 2QO2                 | Renal cell carcinoma                                         |
| 6.                                                                             | EphA3          | V688D           | Kinase        | 2QO2                 | Esophagogastric cancer                                       |
| 7.                                                                             | EphA3          | A748T           | Kinase        | 2QO2                 | Colorectal cancer                                            |
| 8.                                                                             | EphA3          | A749D           | Kinase        | 2QO2                 | Non-small cell lung cancer                                   |
| 9.                                                                             | EphA3          | V762G           | Kinase        | 2QO2                 | Esophagogastric cancer                                       |
| 10.                                                                            | EphA3          | W790C           | Kinase        | 2QO2                 | Non-small cell lung cancer                                   |
| 11.                                                                            | EphA4          | L33S            | LBD           | 2WO1                 | Renal Cell Carcinoma                                         |
| 12.                                                                            | EphA4          | L43H            | LBD           | 2WO1                 | Esophageal squamous cell carcinoma                           |
| 13.                                                                            | EphA5          | Y99H            | LBD           | 4ET7                 | Endometrial carcinoma                                        |
| 14.                                                                            | EphA5          | F132L           | LBD           | 4ET7                 | Esophagogastric Adenocarcinoma                               |
| 15.                                                                            | EphA5          | F132C           | LBD           | 4ET7                 | Esophagogastric Adenocarcinoma and Colorectal Adenocarcinoma |
| 16.                                                                            | EphA5          | F132V           | LBD           | 4ET7                 | Esophagogastric Adenocarcinoma                               |
| 17.                                                                            | EphA5          | I736N           | Kinase        | 2R2P                 | Endometrial carcinoma                                        |
| 18.                                                                            | EphA5          | I737N           | Kinase        | 2R2P                 | Non-Melanoma                                                 |
| 19.                                                                            | EphA5          | L791P           | Kinase        | 2R2P                 | Head & Neck squamous cell carcinoma                          |
| 20.                                                                            | EphA5          | H798N           | Kinase        | 2R2P                 | Esophagogastric Adenocarcinoma                               |
| 21.                                                                            | EphA5          | A802T           | Kinase        | 2R2P                 | Pancreatic and Bladder Cancer                                |
| 22.                                                                            | EphA7          | I68K            | LBD           | 3NRU                 | Head & Neck squamous cell carcinoma                          |
| 23.                                                                            | EphA7          | R676S           | Kinase        | 2REI                 | Cervical Carcinoma                                           |
| 24.                                                                            | EphA7          | L749F           | Kinase        | 2REI                 | Hepatobiliary Cancer and Non-Small Cell Lung Cancer          |
| 25.                                                                            | EphB1          | G685C           | Kinase        | 3ZFX                 | Small cell lung cancer and non-small cell lung cancer        |
| 26.                                                                            | EphB1          | V741G           | Kinase        | 3ZFX                 | Endometrial carcinoma                                        |
| 27.                                                                            | EphB1          | H742N           | Kinase        | 3ZFX                 | Melanoma                                                     |
| 28.                                                                            | EphB1          | V760A           | Kinase        | 3ZFX                 | Mature B-Cell Neoplasms                                      |
| 29.                                                                            | EphB3          | L749Q           | Kinase        | 3ZFY                 | Hepatocellular carcinoma                                     |
| 30.                                                                            | EphB4          | L731R           | Kinase        | 6FNL                 | Melanoma                                                     |
| 31.                                                                            | EphB4          | V748A           | Kinase        | 6FNL                 | Lung squamous cell carcinoma                                 |

|     |          |       |     |      |                            |
|-----|----------|-------|-----|------|----------------------------|
| 32. | EphrinA2 | W112C | RBD | 2WO3 | Non-small cell lung cancer |
|-----|----------|-------|-----|------|----------------------------|
