# Supplementary material for: In-silico and structure-based assessment to evaluate pathogenicity of missense mutations associated with non-small cell lung cancer identified in the Eph-ephrin class of proteins
Source: PubMed Central journal article supplement (PMC10584653; doi:10.5808/gi.22069), 2023-09-27
Supplement: gi-22069-Supplementary-Table-3.pdf [file gi-22069-Supplementary-Table-3.pdf]

| <b>Supplementary Table 3 – Time-averaged secondary structure percentage analysis</b> |             |                |             |             |                |
|--------------------------------------------------------------------------------------|-------------|----------------|-------------|-------------|----------------|
| <b>Secondary structure</b>                                                           | <b>Coil</b> | <b>B-Sheet</b> | <b>Bend</b> | <b>Turn</b> | <b>A-Helix</b> |
| <b>Ephrin A2</b>                                                                     | 29          | 34             | 17          | 14          | 3              |
| <b>W112C</b>                                                                         | 32          | 34             | 15          | 13          | 3              |
| <b>EphA3 (KD)</b>                                                                    | 24          | 16             | 10          | 14          | 33             |
| <b>A749D</b>                                                                         | 24          | 15             | 10          | 14          | 33             |
| <b>W790C</b>                                                                         | 23          | 15             | 10          | 14          | 34             |
| <b>EphA3 (LBD)</b>                                                                   | 23          | 46             | 16          | 1           | 2              |
| <b>F152S</b>                                                                         | 23          | 46             | 16          | 1           | 2              |
| <b>EphA7 (KD)</b>                                                                    | 22          | 16             | 13          | 14          | 29             |
| <b>L749F</b>                                                                         | 23          | 15             | 11          | 12          | 34             |
| <b>EphB1 (KD)</b>                                                                    | 23          | 15             | 12          | 13          | 33             |
| <b>G685C</b>                                                                         | 24          | 15             | 12          | 14          | 31             |
| <b>EphB4</b>                                                                         | 24          | 16             | 10          | 11          | 35             |
| <b>V748A</b>                                                                         | 22          | 16             | 11          | 12          | 34             |
